# Supplementary material for: Electron interaction with a DNA duplex: dCpdC:dGpdG
Source: Royal Society of Chemistry journal article supplement (doi:10.1039/c6cp01408a), 2016-01-01
Supplement: c6cp01408a1.pdf [file c6cp01408a1.pdf]

## Electron Interaction with the DNA Duplex: dCpdC:dGpdG

Jiande Gu,<sup>a\*</sup> Jing Wang,<sup>b</sup> and Jerzy Leszczynski,<sup>b\*</sup>

*<sup>a</sup> Drug Design & Discovery Center*

*State Key Laboratory of Drug Research*

*Shanghai Institute of Materia Medica*

*Chinese Academy of Sciences*

*Shanghai 201203 China*

### Supporting Information

Coordinates of the optimized structure of dC<sup>□-</sup>pdC:dGpdG and dCpdC<sup>□-</sup>:dGpdG are attached as following.

dC<sup>□-</sup>pdC:dGpdG

|   |          |            |           |          |
|---|----------|------------|-----------|----------|
| 8 | 8.000000 | -16.806801 | -7.480046 | 1.324906 |
| 6 | 6.000000 | -17.846141 | -5.481309 | 2.749049 |
| 1 | 1.000000 | -19.762146 | -5.160202 | 2.038125 |
| 1 | 1.000000 | -17.972825 | -5.983605 | 4.758937 |
| 6 | 6.000000 | -16.290660 | -3.076830 | 2.497588 |
| 1 | 1.000000 | -17.109087 | -1.591842 | 3.693729 |
| 8 | 8.000000 | -13.783128 | -3.630109 | 3.303148 |
| 6 | 6.000000 | -12.009993 | -2.744904 | 1.449918 |
| 1 | 1.000000 | -11.474277 | -0.782977 | 1.854059 |

---

\* Corresponding authors' email address: JG, [jiande@icnanotox.org](mailto:jiande@icnanotox.org); JL, [jerzy@icnanotox.org](mailto:jerzy@icnanotox.org).

|    |           |            |           |           |
|----|-----------|------------|-----------|-----------|
| 7  | 7.000000  | -9.734883  | -4.169573 | 1.625942  |
| 6  | 6.000000  | -9.330126  | -6.731991 | 1.233321  |
| 1  | 1.000000  | -10.837009 | -7.973606 | 0.625394  |
| 7  | 7.000000  | -7.011124  | -7.416459 | 1.656190  |
| 6  | 6.000000  | -5.786193  | -5.212697 | 2.331065  |
| 6  | 6.000000  | -3.199783  | -4.719314 | 2.964569  |
| 8  | 8.000000  | -1.444603  | -6.232614 | 3.152822  |
| 7  | 7.000000  | -2.792184  | -2.133975 | 3.417958  |
| 1  | 1.000000  | -0.933816  | -1.618061 | 3.763269  |
| 6  | 6.000000  | -4.598216  | -0.275826 | 3.327716  |
| 7  | 7.000000  | -3.851331  | 2.104057  | 3.861896  |
| 1  | 1.000000  | -1.970364  | 2.550373  | 3.874821  |
| 1  | 1.000000  | -5.089672  | 3.451644  | 3.304507  |
| 7  | 7.000000  | -7.002913  | -0.726913 | 2.820397  |
| 6  | 6.000000  | -7.439861  | -3.181100 | 2.323317  |
| 6  | 6.000000  | -16.063924 | -2.063103 | -0.222376 |
| 1  | 1.000000  | -17.582978 | -2.692936 | -1.470812 |
| 6  | 6.000000  | -13.455986 | -2.949425 | -1.031122 |
| 1  | 1.000000  | -13.584534 | -4.927409 | -1.620935 |
| 1  | 1.000000  | -12.624573 | -1.869546 | -2.576877 |
| 8  | 8.000000  | -16.225577 | 0.665044  | 0.027768  |
| 15 | 15.000000 | -15.446795 | 2.545385  | -2.207664 |
| 8  | 8.000000  | -17.192813 | 4.959974  | -1.613354 |
| 8  | 8.000000  | -15.594697 | 1.481815  | -4.769189 |

|   |          |            |           |           |
|---|----------|------------|-----------|-----------|
| 8 | 8.000000 | -12.739154 | 3.623062  | -1.489565 |
| 6 | 6.000000 | -12.249422 | 4.930929  | 0.854182  |
| 1 | 1.000000 | -13.881059 | 6.114355  | 1.321714  |
| 1 | 1.000000 | -11.920676 | 3.530043  | 2.339792  |
| 6 | 6.000000 | -9.906804  | 6.561029  | 0.538038  |
| 1 | 1.000000 | -9.833872  | 7.885903  | 2.129922  |
| 8 | 8.000000 | -7.685019  | 5.069313  | 0.583514  |
| 6 | 6.000000 | -6.486735  | 4.962493  | -1.839250 |
| 1 | 1.000000 | -4.653291  | 5.908225  | -1.702410 |
| 7 | 7.000000 | -5.950411  | 2.389557  | -2.495268 |
| 6 | 6.000000 | -7.646641  | 0.463530  | -3.028881 |
| 1 | 1.000000 | -9.643854  | 0.854213  | -3.196375 |
| 7 | 7.000000 | -6.570054  | -1.732207 | -3.280786 |
| 6 | 6.000000 | -4.029557  | -1.273984 | -2.867836 |
| 6 | 6.000000 | -1.869134  | -2.934344 | -2.889790 |
| 8 | 8.000000 | -1.818881  | -5.224583 | -3.235655 |
| 7 | 7.000000 | 0.376547   | -1.594287 | -2.433587 |
| 1 | 1.000000 | 2.082667   | -2.614344 | -2.494584 |
| 6 | 6.000000 | 0.555686   | 0.956892  | -2.046590 |
| 7 | 7.000000 | 2.896731   | 1.890849  | -1.727674 |
| 1 | 1.000000 | 4.482248   | 0.909713  | -2.290670 |
| 1 | 1.000000 | 3.041254   | 3.787501  | -1.611015 |
| 7 | 7.000000 | -1.420681  | 2.495565  | -1.953463 |
| 6 | 6.000000 | -3.607238  | 1.267936  | -2.373687 |

|   |          |            |           |           |
|---|----------|------------|-----------|-----------|
| 6 | 6.000000 | -9.826826  | 8.040691  | -1.951333 |
| 1 | 1.000000 | -11.731611 | 8.416643  | -2.684224 |
| 6 | 6.000000 | -8.307939  | 6.289566  | -3.664955 |
| 1 | 1.000000 | -9.562016  | 4.913449  | -4.555971 |
| 1 | 1.000000 | -7.289950  | 7.304936  | -5.149524 |
| 8 | 8.000000 | -8.538241  | 10.333845 | -1.425192 |
| 1 | 1.000000 | -15.149374 | -7.812128 | 2.018466  |
| 1 | 1.000000 | -8.048015  | 11.114992 | -2.995196 |
| 1 | 1.000000 | -18.916986 | 4.729612  | -2.163333 |
| 8 | 8.000000 | 17.357064  | -6.853073 | -1.751434 |
| 6 | 6.000000 | 17.963643  | -4.969464 | -3.537798 |
| 1 | 1.000000 | 19.866973  | -4.292379 | -3.089168 |
| 1 | 1.000000 | 17.979308  | -5.744664 | -5.464066 |
| 6 | 6.000000 | 16.089603  | -2.794825 | -3.427771 |
| 1 | 1.000000 | 16.577750  | -1.364905 | -4.854600 |
| 8 | 8.000000 | 13.654418  | -3.806519 | -3.902410 |
| 6 | 6.000000 | 11.873641  | -2.620886 | -2.193107 |
| 1 | 1.000000 | 11.364661  | -0.760979 | -2.928601 |
| 7 | 7.000000 | 9.616027   | -4.053972 | -2.056359 |
| 6 | 6.000000 | 9.675178   | -6.485835 | -0.927072 |
| 1 | 1.000000 | 11.488998  | -7.438165 | -0.990509 |
| 6 | 6.000000 | 7.384499   | -7.849760 | -0.938943 |
| 1 | 1.000000 | 7.368847   | -9.830899 | -0.411006 |
| 6 | 6.000000 | 5.193171   | -6.663258 | -1.739271 |

|    |           |           |           |           |
|----|-----------|-----------|-----------|-----------|
| 7  | 7.000000  | 2.912495  | -7.886036 | -1.873727 |
| 1  | 1.000000  | 2.678078  | -9.479113 | -0.860782 |
| 1  | 1.000000  | 1.307017  | -6.889531 | -2.244166 |
| 7  | 7.000000  | 5.141379  | -4.156917 | -2.452246 |
| 6  | 6.000000  | 7.304903  | -2.856764 | -2.639284 |
| 8  | 8.000000  | 7.369360  | -0.566172 | -3.250679 |
| 6  | 6.000000  | 15.952476 | -1.490437 | -0.818590 |
| 1  | 1.000000  | 17.571855 | -1.903659 | 0.394297  |
| 6  | 6.000000  | 13.440090 | -2.394256 | 0.228756  |
| 1  | 1.000000  | 13.688229 | -4.256362 | 1.090996  |
| 1  | 1.000000  | 12.619985 | -1.131354 | 1.640974  |
| 8  | 8.000000  | 15.937247 | 1.214899  | -1.327228 |
| 15 | 15.000000 | 15.325464 | 3.153556  | 0.905403  |
| 8  | 8.000000  | 16.439932 | 5.743115  | -0.232205 |
| 8  | 8.000000  | 16.219524 | 2.391641  | 3.424435  |
| 8  | 8.000000  | 12.377672 | 3.716765  | 0.819033  |
| 6  | 6.000000  | 11.099929 | 4.812275  | -1.339248 |
| 1  | 1.000000  | 12.470001 | 5.876200  | -2.463942 |
| 1  | 1.000000  | 10.251903 | 3.276334  | -2.442352 |
| 6  | 6.000000  | 9.006880  | 6.550009  | -0.392159 |
| 1  | 1.000000  | 8.581442  | 7.931571  | -1.875452 |
| 8  | 8.000000  | 6.773668  | 5.149250  | 0.096046  |
| 6  | 6.000000  | 6.193549  | 5.035223  | 2.727235  |
| 1  | 1.000000  | 4.458903  | 6.085850  | 3.089934  |

|   |          |           |           |           |
|---|----------|-----------|-----------|-----------|
| 7 | 7.000000 | 5.647436  | 2.430362  | 3.394976  |
| 6 | 6.000000 | 7.452677  | 0.627186  | 2.946325  |
| 1 | 1.000000 | 9.309163  | 1.330656  | 2.439474  |
| 6 | 6.000000 | 6.926971  | -1.857163 | 3.095151  |
| 1 | 1.000000 | 8.339209  | -3.298916 | 2.727400  |
| 6 | 6.000000 | 4.333447  | -2.531335 | 3.573032  |
| 7 | 7.000000 | 3.693153  | -4.966729 | 3.654203  |
| 1 | 1.000000 | 4.940364  | -6.214847 | 2.908313  |
| 1 | 1.000000 | 1.810467  | -5.444457 | 3.600854  |
| 7 | 7.000000 | 2.559855  | -0.786512 | 3.978429  |
| 6 | 6.000000 | 3.113151  | 1.713040  | 3.848220  |
| 8 | 8.000000 | 1.503807  | 3.378070  | 4.137253  |
| 6 | 6.000000 | 9.622191  | 7.937335  | 2.075762  |
| 1 | 1.000000 | 11.662530 | 8.211737  | 2.318882  |
| 6 | 6.000000 | 8.489862  | 6.184917  | 4.075400  |
| 1 | 1.000000 | 9.861413  | 4.730583  | 4.594535  |
| 1 | 1.000000 | 7.931388  | 7.195771  | 5.789424  |
| 8 | 8.000000 | 8.349266  | 10.298763 | 1.957698  |
| 1 | 1.000000 | 15.626433 | -7.340611 | -2.087899 |
| 1 | 1.000000 | 8.403704  | 11.081929 | 3.600421  |
| 1 | 1.000000 | 18.264227 | 5.768902  | -0.246350 |

dCpdC<sup>•-</sup>:dGpdG

|   |          |            |           |          |
|---|----------|------------|-----------|----------|
| 8 | 8.000000 | -16.899819 | -7.514538 | 1.370951 |
|---|----------|------------|-----------|----------|

|   |          |            |           |           |
|---|----------|------------|-----------|-----------|
| 6 | 6.000000 | -17.686059 | -5.542353 | 3.001353  |
| 1 | 1.000000 | -19.638140 | -5.082673 | 2.503864  |
| 1 | 1.000000 | -17.644279 | -6.150338 | 4.981173  |
| 6 | 6.000000 | -16.057594 | -3.199126 | 2.704194  |
| 1 | 1.000000 | -16.780172 | -1.693766 | 3.930472  |
| 8 | 8.000000 | -13.517278 | -3.818061 | 3.418141  |
| 6 | 6.000000 | -11.829598 | -2.863258 | 1.544084  |
| 1 | 1.000000 | -11.362532 | -0.881017 | 1.939614  |
| 7 | 7.000000 | -9.476774  | -4.193836 | 1.648930  |
| 6 | 6.000000 | -8.950980  | -6.687847 | 1.077148  |
| 1 | 1.000000 | -10.422539 | -7.997064 | 0.530417  |
| 7 | 7.000000 | -6.554457  | -7.240140 | 1.294858  |
| 6 | 6.000000 | -5.412275  | -4.996711 | 2.030258  |
| 6 | 6.000000 | -2.826842  | -4.320043 | 2.491224  |
| 8 | 8.000000 | -1.010135  | -5.855181 | 2.310872  |
| 7 | 7.000000 | -2.419425  | -1.846257 | 3.141187  |
| 1 | 1.000000 | 0.961417   | -0.965321 | 3.752359  |
| 6 | 6.000000 | -4.360408  | -0.192631 | 3.248260  |
| 7 | 7.000000 | -3.771861  | 2.259024  | 3.887898  |
| 1 | 1.000000 | -1.946761  | 2.771710  | 3.555049  |
| 1 | 1.000000 | -5.095846  | 3.516521  | 3.302423  |
| 7 | 7.000000 | -6.814320  | -0.674972 | 2.866895  |
| 6 | 6.000000 | -7.196601  | -3.096041 | 2.256014  |
| 6 | 6.000000 | -15.904780 | -2.206257 | -0.031096 |

|    |           |            |           |           |
|----|-----------|------------|-----------|-----------|
| 1  | 1.000000  | -17.467377 | -2.844583 | -1.216614 |
| 6  | 6.000000  | -13.320757 | -3.106854 | -0.903265 |
| 1  | 1.000000  | -13.461992 | -5.093130 | -1.460526 |
| 1  | 1.000000  | -12.539825 | -2.026604 | -2.473579 |
| 8  | 8.000000  | -16.013107 | 0.524287  | 0.173297  |
| 15 | 15.000000 | -15.526036 | 2.373032  | -2.164888 |
| 8  | 8.000000  | -17.512603 | 4.588895  | -1.709254 |
| 8  | 8.000000  | -15.485632 | 1.133972  | -4.664159 |
| 8  | 8.000000  | -12.940466 | 3.790458  | -1.572006 |
| 6  | 6.000000  | -12.580321 | 5.248382  | 0.704734  |
| 1  | 1.000000  | -14.182164 | 6.531266  | 0.955315  |
| 1  | 1.000000  | -12.453447 | 3.956842  | 2.314767  |
| 6  | 6.000000  | -10.156866 | 6.756425  | 0.458354  |
| 1  | 1.000000  | -10.054137 | 8.043513  | 2.076127  |
| 8  | 8.000000  | -8.006371  | 5.126851  | 0.527504  |
| 6  | 6.000000  | -6.710480  | 5.116204  | -1.832252 |
| 1  | 1.000000  | -4.894755  | 6.080058  | -1.614775 |
| 7  | 7.000000  | -6.106918  | 2.542899  | -2.520380 |
| 6  | 6.000000  | -7.771759  | 0.633033  | -3.146073 |
| 1  | 1.000000  | -9.776372  | 1.006837  | -3.290156 |
| 7  | 7.000000  | -6.662469  | -1.539815 | -3.515482 |
| 6  | 6.000000  | -4.129352  | -1.060596 | -3.091211 |
| 6  | 6.000000  | -1.960395  | -2.678596 | -3.208403 |
| 8  | 8.000000  | -1.856504  | -4.960016 | -3.698598 |



|   |          |            |           |           |
|---|----------|------------|-----------|-----------|
| 7 | 7.000000 | 0.261516   | -1.347604 | -2.697040 |
| 1 | 1.000000 | 1.895505   | -2.425062 | -2.651974 |
| 6 | 6.000000 | 0.425453   | 1.183513  | -2.151373 |
| 7 | 7.000000 | 2.765880   | 2.112551  | -1.809324 |
| 1 | 1.000000 | 4.338929   | 1.111629  | -2.303348 |
| 1 | 1.000000 | 2.946479   | 3.968841  | -1.413885 |
| 7 | 7.000000 | -1.565248  | 2.684092  | -1.990033 |
| 6 | 6.000000 | -3.751033  | 1.462972  | -2.463893 |
| 6 | 6.000000 | -9.929689  | 8.262693  | -2.003142 |
| 1 | 1.000000 | -11.783859 | 8.756309  | -2.782218 |
| 6 | 6.000000 | -8.450036  | 6.467552  | -3.706192 |
| 1 | 1.000000 | -9.736622  | 5.123956  | -4.600139 |
| 1 | 1.000000 | -7.387265  | 7.456356  | -5.172732 |
| 8 | 8.000000 | -8.515423  | 10.466364 | -1.414082 |
| 1 | 1.000000 | -15.340743 | -8.198067 | 2.027492  |
| 1 | 1.000000 | -8.247435  | 11.425704 | -2.942582 |
| 1 | 1.000000 | -19.270139 | 4.076461  | -1.752118 |
| 8 | 8.000000 | 15.834224  | -7.277606 | -0.954168 |
| 6 | 6.000000 | 17.028348  | -5.954342 | -2.960194 |
| 1 | 1.000000 | 19.053348  | -5.705733 | -2.589704 |
| 1 | 1.000000 | 16.795364  | -6.962171 | -4.754930 |
| 6 | 6.000000 | 15.805822  | -3.374778 | -3.208228 |
| 1 | 1.000000 | 16.815786  | -2.290644 | -4.652577 |
| 8 | 8.000000 | 13.222424  | -3.663957 | -3.967552 |

|    |           |           |           |           |
|----|-----------|-----------|-----------|-----------|
| 6  | 6.000000  | 11.582152 | -2.593449 | -2.129402 |
| 1  | 1.000000  | 10.979638 | -0.709832 | -2.714954 |
| 7  | 7.000000  | 9.291956  | -4.100191 | -1.984737 |
| 6  | 6.000000  | 9.415925  | -6.560112 | -1.210233 |
| 1  | 1.000000  | 11.308646 | -7.293902 | -0.890622 |
| 6  | 6.000000  | 7.297835  | -7.962834 | -0.912714 |
| 1  | 1.000000  | 7.385247  | -9.913635 | -0.306633 |
| 6  | 6.000000  | 4.928059  | -6.732113 | -1.426608 |
| 7  | 7.000000  | 2.745906  | -7.952247 | -1.083056 |
| 1  | 1.000000  | 2.739683  | -9.646454 | -0.208134 |
| 1  | 1.000000  | 1.087377  | -6.968584 | -1.120868 |
| 7  | 7.000000  | 4.835342  | -4.370843 | -2.296214 |
| 6  | 6.000000  | 6.973030  | -3.010773 | -2.662581 |
| 8  | 8.000000  | 6.928022  | -0.851878 | -3.569633 |
| 6  | 6.000000  | 15.726209 | -1.874745 | -0.730241 |
| 1  | 1.000000  | 17.281153 | -2.321864 | 0.549317  |
| 6  | 6.000000  | 13.125407 | -2.501723 | 0.306689  |
| 1  | 1.000000  | 13.202593 | -4.350724 | 1.219801  |
| 1  | 1.000000  | 12.424604 | -1.109324 | 1.653845  |
| 8  | 8.000000  | 15.869738 | 0.773374  | -1.421533 |
| 15 | 15.000000 | 15.610129 | 2.887659  | 0.733159  |
| 8  | 8.000000  | 17.051901 | 5.231297  | -0.478108 |
| 8  | 8.000000  | 16.370063 | 2.015731  | 3.272301  |
| 8  | 8.000000  | 12.764894 | 3.859752  | 0.708980  |

|   |          |           |           |           |
|---|----------|-----------|-----------|-----------|
| 6 | 6.000000 | 11.643829 | 5.187146  | -1.398372 |
| 1 | 1.000000 | 13.060950 | 6.426495  | -2.248795 |
| 1 | 1.000000 | 10.987669 | 3.799076  | -2.784799 |
| 6 | 6.000000 | 9.425113  | 6.752341  | -0.464684 |
| 1 | 1.000000 | 8.965206  | 8.118460  | -1.951868 |
| 8 | 8.000000 | 7.259102  | 5.212529  | -0.028191 |
| 6 | 6.000000 | 6.559325  | 5.203282  | 2.592907  |
| 1 | 1.000000 | 4.849347  | 6.326738  | 2.835739  |
| 7 | 7.000000 | 5.931480  | 2.648727  | 3.320051  |
| 6 | 6.000000 | 7.827693  | 0.771196  | 3.107259  |
| 1 | 1.000000 | 9.702259  | 1.452302  | 2.697946  |
| 6 | 6.000000 | 7.179051  | -1.756245 | 3.466514  |
| 1 | 1.000000 | 8.618405  | -3.215850 | 3.420646  |
| 6 | 6.000000 | 4.695798  | -2.413787 | 3.852267  |
| 7 | 7.000000 | 3.788208  | -4.801453 | 4.404259  |
| 1 | 1.000000 | 5.066907  | -6.179310 | 4.039526  |
| 1 | 1.000000 | 2.043432  | -5.200909 | 3.627140  |
| 7 | 7.000000 | 2.870815  | -0.497318 | 3.871415  |
| 6 | 6.000000 | 3.409977  | 2.013588  | 3.588082  |
| 8 | 8.000000 | 1.717174  | 3.622152  | 3.634547  |
| 6 | 6.000000 | 9.926342  | 8.155399  | 2.020687  |
| 1 | 1.000000 | 11.945947 | 8.505228  | 2.315044  |
| 6 | 6.000000 | 8.804098  | 6.373743  | 3.994045  |
| 1 | 1.000000 | 10.188009 | 4.936557  | 4.522487  |

|   |          |           |           |           |
|---|----------|-----------|-----------|-----------|
| 1 | 1.000000 | 8.201522  | 7.373816  | 5.696465  |
| 8 | 8.000000 | 8.569286  | 10.469159 | 1.877823  |
| 1 | 1.000000 | 16.556162 | -8.945955 | -0.825911 |
| 1 | 1.000000 | 8.762549  | 11.363357 | 3.456281  |
| 1 | 1.000000 | 18.825697 | 4.953619  | -0.838073 |
